# Supplementary material
Source: PubMed Central journal article supplement (PMC10117690)
Supplement: NIHMS1878028-supplement-Supplementary_Materials.pdf [file NIHMS1878028-supplement-Supplementary_Materials.pdf]

**Supplementary information**

---

**A machine-vision-based frailty index for mice**

---

In the format provided by the authors and unedited

Table S1: Testing batches

| Batch   | Males | Females | Total Mice | Repeated Mice |
|---------|-------|---------|------------|---------------|
| Batch 1 | 141   | 81      | 222        | NA            |
| Batch 2 | 173   | 146     | 319        | 105           |
| Batch 3 | 57    | 45      | 102        | 33            |
| Total   | 371   | 272     | 643        |               |

Table S2: Video Features

| Video Metrics |                        |                                                                                                                                                                                                                                                                                          |            |
|---------------|------------------------|------------------------------------------------------------------------------------------------------------------------------------------------------------------------------------------------------------------------------------------------------------------------------------------|------------|
| Category      | Name                   | Description                                                                                                                                                                                                                                                                              | Units      |
| Open Field    | distance_cm            | Sum of locomotor activity.                                                                                                                                                                                                                                                               | cm         |
| Open Field    | center_time_secs       | Sum of time spent in center.                                                                                                                                                                                                                                                             | sec        |
| Open Field    | periphery_time_secs    | Sum of time spent along any wall.                                                                                                                                                                                                                                                        | sec        |
| Open Field    | corner_time_secs       | Sum of time spent in any corner.                                                                                                                                                                                                                                                         | sec        |
| Open Field    | center_distance_cm     | Average distance from center across the video.                                                                                                                                                                                                                                           | cm         |
| Open Field    | periphery_distance_cm  | Average distance from nearest periphery across the video.                                                                                                                                                                                                                                | cm         |
| Open Field    | corner_distance_cm     | Average distance from nearest corners across the video.                                                                                                                                                                                                                                  | cm         |
| Open Field    | grooming_number_bouts  | Sum of all grooming bouts in video.                                                                                                                                                                                                                                                      | ~          |
| Open Field    | grooming_duration_secs | Average length of grooming bouts.                                                                                                                                                                                                                                                        | sec        |
| Gait          | angular_velocity       | The first derivative of angle of a mouse, determined by the vector connecting the mouse's base of tail to its base of neck                                                                                                                                                               | deg/second |
| Gait          | lateral_displacement   | The difference between the minimum and maximum values of a reference point's perpendicular distance from the mouse's displacement vector for a stride for each frame of a stride, normalized by the mouse's body length. The reference points used are nose, base of tail, and tail tip. | ~          |
| Gait          | limb_duty_factor       | The amount of time that the paw is in contact with the ground divided by the full stride time, calculated and averaged for each hind paw.                                                                                                                                                | ~          |
| Gait          | speed_cm_per_sec       | Speed is determined by the base of tail point.                                                                                                                                                                                                                                           | cm/second  |
| Gait          | step_length            | The distance that the right hind paw travels past the previous opposite paw strike. Step_length 1 uses left hind paw strike, while step_length2 uses right hind paw strike.                                                                                                              | cm         |

| Video Features |                   |                                                                                                                                                                                        |           |
|----------------|-------------------|----------------------------------------------------------------------------------------------------------------------------------------------------------------------------------------|-----------|
| Category       | Name              | Description                                                                                                                                                                            | Units     |
| Gait           | step_width        | The length of the shortest line segment that connects the right hind paw strike to the line that connects the left hind paw's toe-off location to its subsequent foot strike position. | cm        |
| Gait           | stride_length     | The full distance that the left hind paw travels for a stride, from toe-off to foot-strike.                                                                                            | cm        |
| Gait           | temporal_symmetry | The difference in time between the left and right hindpaw strike, divided by the total strike time.                                                                                    | ~         |
| Gait           | stride_count      | Sum of all recorded strides in video.                                                                                                                                                  | strides   |
| Gait           | distance_cm_sc    | Sum of locomotor activity, normalized by time spent in open field.                                                                                                                     | cm/second |
| Engineered     | dAC               | Distance between base of head and base of tail, normalized by the max dAC recorded.                                                                                                    | cm        |
| Engineered     | dB                | The distance between the mid-back point and the midpoint of the line AC.                                                                                                               | cm        |
| Engineered     | aABC              | The angle between the base of head point, mid-back point, and base of tail point.                                                                                                      | degrees   |
| Engineered     | width             | Width of the ellipse fit for the mouse calculated for all frames.                                                                                                                      | cm        |
| Engineered     | length            | Length of the ellipse fit for the mouse calculated for all frames.                                                                                                                     | cm        |
| Engineered     | rearpaw           | The distance between rearpaws calculated for all frames.                                                                                                                               | cm        |
| Engineered     | rear_count        | Sum of rearing bouts in video.                                                                                                                                                         | ~         |
| Engineered     | avg_rear_len      | Average length of rearing bouts in video.                                                                                                                                              | sec       |
| End of Table   |                   |                                                                                                                                                                                        |           |

Table S3: vFI Feature Correlation (Pearson) with FI score. P-value calculated using Wald Test with t-distribution of the test statistic.

| vFI feature correlation with FI score. |          |        |        |        |         |        |
|----------------------------------------|----------|--------|--------|--------|---------|--------|
| Features                               | All Mice |        | Males  |        | Females |        |
|                                        | Cor      | Pvalue | Cor    | Pvalue | Cor     | Pvalue |
| tip_tail_lateral_displacement_iqr      | 0.629    | 0.000  | 0.582  | 0.000  | 0.659   | 0.000  |
| median_step_width                      | 0.561    | 0.000  | 0.513  | 0.000  | 0.559   | 0.000  |
| median_width                           | 0.556    | 0.000  | 0.561  | 0.000  | 0.497   | 0.000  |
| step_length2_iqr                       | 0.551    | 0.000  | 0.595  | 0.000  | 0.421   | 0.000  |
| base_tail_lateral_displacement_iqr     | 0.547    | 0.000  | 0.498  | 0.000  | 0.614   | 0.000  |
| median_rearpaw                         | 0.545    | 0.000  | 0.493  | 0.000  | 0.552   | 0.000  |
| step_length1_iqr                       | 0.544    | 0.000  | 0.584  | 0.000  | 0.418   | 0.000  |
| step_width_iqr                         | 0.504    | 0.000  | 0.474  | 0.000  | 0.507   | 0.000  |
| median_length                          | 0.494    | 0.000  | 0.386  | 0.000  | 0.552   | 0.000  |
| stride_length_iqr                      | 0.481    | 0.000  | 0.483  | 0.000  | 0.425   | 0.000  |
| avg_bout_len                           | -0.467   | 0.000  | -0.456 | 0.000  | -0.448  | 0.000  |
| temporal_symmetry_iqr                  | 0.458    | 0.000  | 0.485  | 0.000  | 0.350   | 0.000  |
| dB_median                              | 0.455    | 0.000  | 0.382  | 0.000  | 0.496   | 0.000  |
| median_speed_cm_per_sec                | -0.442   | 0.000  | -0.493 | 0.000  | -0.335  | 0.000  |
| dB_nongait_median                      | 0.429    | 0.000  | 0.328  | 0.000  | 0.561   | 0.000  |
| dAC_nongait_median                     | 0.402    | 0.000  | 0.320  | 0.000  | 0.440   | 0.000  |
| median_stride_length                   | -0.395   | 0.000  | -0.480 | 0.000  | -0.189  | 0.002  |
| rears_0_5                              | -0.390   | 0.000  | -0.362 | 0.000  | -0.391  | 0.000  |
| dAC_stdev                              | -0.317   | 0.000  | -0.341 | 0.000  | -0.225  | 0.000  |
| limb_duty_factor_iqr                   | 0.314    | 0.000  | 0.346  | 0.000  | 0.184   | 0.002  |
| dAC_min                                | 0.290    | 0.000  | 0.323  | 0.000  | 0.232   | 0.000  |
| median_tip_tail_lateral_displacement   | 0.275    | 0.000  | 0.126  | 0.012  | 0.558   | 0.000  |
| rear_count                             | -0.274   | 0.000  | -0.348 | 0.000  | -0.155  | 0.010  |
| speed_cm_per_sec_iqr                   | -0.247   | 0.000  | -0.325 | 0.000  | -0.165  | 0.006  |
| rears_5_10                             | -0.237   | 0.000  | -0.259 | 0.000  | -0.169  | 0.005  |
| aABC_nongait_stdev                     | -0.227   | 0.000  | -0.361 | 0.000  | -0.063  | 0.297  |
| corner_distance_cm                     | -0.224   | 0.000  | -0.263 | 0.000  | -0.118  | 0.049  |
| aABC_stdev                             | -0.222   | 0.000  | -0.340 | 0.000  | -0.097  | 0.108  |
| aABC_min                               | 0.221    | 0.000  | 0.257  | 0.000  | 0.176   | 0.003  |
| median_step_length1                    | -0.216   | 0.000  | -0.293 | 0.000  | -0.014  | 0.823  |
| angular_velocity_iqr                   | 0.209    | 0.000  | 0.175  | 0.000  | 0.348   | 0.000  |
| grooming_number_bouts                  | -0.190   | 0.000  | -0.217 | 0.000  | -0.094  | 0.119  |
| dB_nongait_min                         | 0.186    | 0.000  | 0.191  | 0.000  | 0.214   | 0.000  |
| periphery_distance_cm                  | -0.178   | 0.000  | -0.246 | 0.000  | -0.039  | 0.521  |
| median_step_length2                    | -0.178   | 0.000  | -0.256 | 0.000  | -0.016  | 0.794  |
| distance_cm                            | -0.161   | 0.000  | -0.229 | 0.000  | -0.027  | 0.655  |
| median_temporal_symmetry               | 0.160    | 0.000  | 0.174  | 0.001  | 0.138   | 0.024  |
| grooming_duration_secs                 | -0.151   | 0.000  | -0.111 | 0.029  | -0.185  | 0.002  |
| median_base_tail_lateral_displacement  | 0.149    | 0.000  | -0.003 | 0.950  | 0.511   | 0.000  |
| aABC_median                            | -0.148   | 0.000  | -0.093 | 0.065  | -0.149  | 0.013  |
| periphery_time_secs                    | -0.115   | 0.003  | -0.093 | 0.067  | -0.140  | 0.020  |
| Distance cm/sc                         | -0.105   | 0.006  | -0.182 | 0.000  | 0.068   | 0.259  |
| dB_nongait_max                         | -0.102   | 0.009  | -0.095 | 0.061  | -0.121  | 0.046  |
| dAC_nongait_stdev                      | -0.096   | 0.014  | -0.144 | 0.005  | -0.042  | 0.490  |

| vFI Feature correlation with FI score (Table continued) |          |        |        |        |         |        |
|---------------------------------------------------------|----------|--------|--------|--------|---------|--------|
| Features                                                | All Mice |        | Males  |        | Females |        |
|                                                         | Cor      | Pvalue | Cor    | Pvalue | Cor     | Pvalue |
| nose_lateral_displacement_iqr                           | -0.095   | 0.013  | -0.164 | 0.001  | 0.121   | 0.045  |
| corner_time_secs                                        | -0.087   | 0.024  | -0.013 | 0.803  | -0.164  | 0.006  |
| center_distance_cm                                      | -0.074   | 0.057  | -0.119 | 0.018  | 0.006   | 0.921  |
| dAC_median                                              | 0.071    | 0.066  | 0.047  | 0.352  | 0.131   | 0.030  |
| dB_max                                                  | 0.064    | 0.100  | 0.030  | 0.557  | 0.063   | 0.297  |
| aABC_nongait_median                                     | -0.059   | 0.128  | -0.007 | 0.888  | -0.120  | 0.046  |
| center_time_secs                                        | 0.043    | 0.266  | 0.046  | 0.364  | 0.011   | 0.855  |
| dB_stdev                                                | 0.041    | 0.285  | 0.006  | 0.910  | 0.057   | 0.343  |
| stride_count                                            | -0.034   | 0.378  | -0.023 | 0.649  | 0.052   | 0.392  |
| dB_nongait_stdev                                        | -0.031   | 0.432  | -0.080 | 0.117  | 0.030   | 0.615  |
| median_angular_velocity                                 | 0.025    | 0.514  | -0.012 | 0.807  | 0.108   | 0.073  |
| median_limb_duty_factor                                 | 0.007    | 0.853  | -0.033 | 0.517  | 0.092   | 0.127  |
| median_nose_lateral_displacement                        | -0.006   | 0.885  | -0.034 | 0.501  | 0.160   | 0.008  |
| End of Table                                            |          |        |        |        |         |        |

Table S4: vFI feature correlation (Pearson) with age. P-value calculated using Wald Test with t-distribution of the test statistic.

| vFI Feature Correlation with Age      |          |        |        |        |         |        |
|---------------------------------------|----------|--------|--------|--------|---------|--------|
| Features                              | All Mice |        | Males  |        | Females |        |
|                                       | Cor      | Pvalue | Cor    | Pvalue | Cor     | Pvalue |
| tip_tail_lateral_displacement_iqr     | 0.760    | 0.000  | 0.728  | 0.000  | 0.795   | 0.000  |
| median_step_width                     | 0.662    | 0.000  | 0.609  | 0.000  | 0.695   | 0.000  |
| median_width                          | 0.648    | 0.000  | 0.646  | 0.000  | 0.628   | 0.000  |
| step_length2_iqr                      | 0.638    | 0.000  | 0.686  | 0.000  | 0.503   | 0.000  |
| step_length1_iqr                      | 0.637    | 0.000  | 0.691  | 0.000  | 0.494   | 0.000  |
| base_tail_lateral_displacement_iqr    | 0.637    | 0.000  | 0.595  | 0.000  | 0.707   | 0.000  |
| median_rearpaw                        | 0.636    | 0.000  | 0.579  | 0.000  | 0.668   | 0.000  |
| step_width_iqr                        | 0.609    | 0.000  | 0.583  | 0.000  | 0.611   | 0.000  |
| stride_length_iqr                     | 0.564    | 0.000  | 0.575  | 0.000  | 0.502   | 0.000  |
| avg_bout_len                          | -0.559   | 0.000  | -0.559 | 0.000  | -0.530  | 0.000  |
| median_length                         | 0.540    | 0.000  | 0.447  | 0.000  | 0.605   | 0.000  |
| temporal_symmetry_iqr                 | 0.537    | 0.000  | 0.550  | 0.000  | 0.450   | 0.000  |
| dB_nongait_median                     | 0.500    | 0.000  | 0.418  | 0.000  | 0.620   | 0.000  |
| dB_median                             | 0.491    | 0.000  | 0.402  | 0.000  | 0.570   | 0.000  |
| median_speed_cm_per_sec               | -0.482   | 0.000  | -0.508 | 0.000  | -0.401  | 0.000  |
| dAC_nongait_median                    | 0.421    | 0.000  | 0.339  | 0.000  | 0.470   | 0.000  |
| rears_0_5                             | -0.420   | 0.000  | -0.380 | 0.000  | -0.442  | 0.000  |
| median_stride_length                  | -0.411   | 0.000  | -0.499 | 0.000  | -0.170  | 0.005  |
| dAC_stdev                             | -0.399   | 0.000  | -0.420 | 0.000  | -0.302  | 0.000  |
| dAC_min                               | 0.381    | 0.000  | 0.390  | 0.000  | 0.359   | 0.000  |
| median_tip_tail_lateral_displacement  | 0.351    | 0.000  | 0.191  | 0.000  | 0.698   | 0.000  |
| limb_duty_factor_iqr                  | 0.334    | 0.000  | 0.379  | 0.000  | 0.171   | 0.004  |
| aABC_min                              | 0.303    | 0.000  | 0.328  | 0.000  | 0.271   | 0.000  |
| aABC_nongait_stdev                    | -0.295   | 0.000  | -0.369 | 0.000  | -0.204  | 0.001  |
| aABC_stdev                            | -0.291   | 0.000  | -0.357 | 0.000  | -0.231  | 0.000  |
| rear_count                            | -0.274   | 0.000  | -0.313 | 0.000  | -0.192  | 0.001  |
| speed_cm_per_sec_iqr                  | -0.272   | 0.000  | -0.319 | 0.000  | -0.218  | 0.000  |
| rears_5_10                            | -0.260   | 0.000  | -0.248 | 0.000  | -0.240  | 0.000  |
| grooming_number_bouts                 | -0.244   | 0.000  | -0.241 | 0.000  | -0.184  | 0.002  |
| median_base_tail_lateral_displacement | 0.226    | 0.000  | 0.078  | 0.120  | 0.647   | 0.000  |
| median_step_length1                   | -0.215   | 0.000  | -0.288 | 0.000  | 0.010   | 0.868  |
| grooming_duration_secs                | -0.209   | 0.000  | -0.172 | 0.001  | -0.247  | 0.000  |
| median_temporal_symmetry              | 0.207    | 0.000  | 0.228  | 0.000  | 0.174   | 0.004  |
| angular_velocity_iqr                  | 0.207    | 0.000  | 0.175  | 0.000  | 0.352   | 0.000  |
| corner_distance_cm                    | -0.199   | 0.000  | -0.170 | 0.001  | -0.175  | 0.004  |
| dB_nongait_min                        | 0.179    | 0.000  | 0.231  | 0.000  | 0.149   | 0.013  |
| nose_lateral_displacement_iqr         | -0.161   | 0.000  | -0.215 | 0.000  | 0.052   | 0.393  |
| distance_cm                           | -0.155   | 0.000  | -0.184 | 0.000  | -0.062  | 0.305  |
| dAC_nongait_stdev                     | -0.152   | 0.000  | -0.200 | 0.000  | -0.093  | 0.125  |
| periphery_distance_cm                 | -0.152   | 0.000  | -0.168 | 0.001  | -0.071  | 0.239  |
| median_step_length2                   | -0.135   | 0.000  | -0.212 | 0.000  | 0.055   | 0.359  |
| aABC_median                           | -0.130   | 0.001  | -0.090 | 0.074  | -0.108  | 0.074  |
| center_distance_cm                    | -0.114   | 0.003  | -0.159 | 0.002  | -0.025  | 0.683  |
| Distance cm/sc                        | -0.092   | 0.017  | -0.147 | 0.003  | 0.071   | 0.237  |

| vFI feature correlation with age (Table continued) |          |        |        |        |         |        |
|----------------------------------------------------|----------|--------|--------|--------|---------|--------|
| Features                                           | All Mice |        | Males  |        | Females |        |
|                                                    | Cor      | Pvalue | Cor    | Pvalue | Cor     | Pvalue |
| dB_stdev                                           | 0.077    | 0.048  | 0.069  | 0.171  | 0.031   | 0.611  |
| dB_nongait_max                                     | -0.076   | 0.050  | -0.083 | 0.103  | -0.077  | 0.205  |
| corner_time_secs                                   | -0.075   | 0.052  | 0.021  | 0.685  | -0.196  | 0.001  |
| periphery_time_secs                                | -0.074   | 0.056  | -0.018 | 0.716  | -0.148  | 0.014  |
| dB_nongait_stdev                                   | -0.071   | 0.067  | -0.123 | 0.015  | 0.002   | 0.979  |
| dB_max                                             | 0.070    | 0.070  | 0.058  | 0.247  | 0.015   | 0.805  |
| dAC_median                                         | 0.062    | 0.108  | 0.017  | 0.736  | 0.170   | 0.005  |
| median_nose_lateral_displacement                   | -0.046   | 0.233  | -0.077 | 0.126  | 0.139   | 0.021  |
| median_angular_velocity                            | 0.037    | 0.341  | 0.008  | 0.872  | 0.111   | 0.065  |
| aABC_nongait_median                                | -0.034   | 0.378  | -0.003 | 0.949  | -0.074  | 0.223  |
| stride_count                                       | -0.024   | 0.537  | -0.013 | 0.800  | 0.072   | 0.231  |
| median_limb_duty_factor                            | -0.022   | 0.571  | -0.042 | 0.406  | 0.041   | 0.500  |
| center_time_secs                                   | -0.002   | 0.958  | -0.033 | 0.512  | 0.012   | 0.846  |
| End of Table                                       |          |        |        |        |         |        |

Table S5: Manual FI item correlation (Pearson) with age. P-value calculated using Wald Test with t-distribution of the test statistic.

| Features                     | All Mice    |         | Males       |         | Females     |         |
|------------------------------|-------------|---------|-------------|---------|-------------|---------|
|                              | Correlation | p-value | Correlation | p-value | Correlation | p-value |
| Piloerection                 | 0.721       | 0.000   | 0.641       | 0.000   | 0.797       | 0.000   |
| Kyphosis                     | 0.703       | 0.000   | 0.660       | 0.000   | 0.725       | 0.000   |
| Gait.disorders               | 0.674       | 0.000   | 0.631       | 0.000   | 0.694       | 0.000   |
| Coat.condition               | 0.661       | 0.000   | 0.675       | 0.000   | 0.597       | 0.000   |
| Body.condition               | 0.551       | 0.000   | 0.519       | 0.000   | 0.569       | 0.000   |
| Distended.abdomen            | 0.548       | 0.000   | 0.523       | 0.000   | 0.527       | 0.000   |
| Loss.of.fur.colour           | 0.444       | 0.000   | 0.442       | 0.000   | 0.326       | 0.000   |
| Tumours                      | 0.319       | 0.000   | 0.327       | 0.000   | 0.239       | 0.000   |
| Vestibular.disturbance       | 0.317       | 0.000   | 0.297       | 0.000   | 0.310       | 0.000   |
| Breathing.rate.depth         | 0.307       | 0.000   | 0.290       | 0.000   | 0.319       | 0.000   |
| Righting.Reflex              | 0.287       | 0.000   | 0.254       | 0.000   | 0.347       | 0.000   |
| Tremor                       | 0.280       | 0.000   | 0.212       | 0.000   | 0.381       | 0.000   |
| Tail.stiffening              | 0.261       | 0.000   | 0.262       | 0.000   | 0.230       | 0.000   |
| Loss.of.whiskers             | 0.244       | 0.000   | 0.276       | 0.000   | 0.370       | 0.000   |
| Vision.loss..Visual.Placing. | 0.213       | 0.000   | 0.189       | 0.000   | 0.334       | 0.000   |
| Alopecia                     | 0.195       | 0.000   | 0.149       | 0.003   | 0.438       | 0.000   |
| Eye.discharge.swelling       | 0.069       | 0.072   | 0.049       | 0.332   | 0.103       | 0.081   |
| Menace.reflex                | -0.055      | 0.156   | -0.027      | 0.600   | -0.078      | 0.188   |
| Corneal.opacity              | 0.032       | 0.412   | 0.020       | 0.696   | 0.071       | 0.231   |
| Cataracts                    | 0.007       | 0.860   | -0.020      | 0.692   | 0.055       | 0.351   |
| Dermatitis                   | 0.007       | 0.862   | 0.042       | 0.410   | -0.009      | 0.875   |
| Malocclusions                | -0.007      | 0.863   | 0.009       | 0.860   | -0.038      | 0.521   |
| Microphthalmia               | 0.002       | 0.966   | 0.015       | 0.764   | -0.019      | 0.745   |
| Nasal.discharge              |             |         |             |         |             |         |
| Rectal.prolapse              |             |         |             |         |             |         |
| Vaginal.uterine.             |             |         |             |         |             |         |
| Diarrhea                     |             |         |             |         |             |         |



Table S6: Manual Frailty Scoring Rubric (modified from [2])

| System/ Parameter      | Clinical assessment of deficit                                                               | Scoring                                                                                                          |
|------------------------|----------------------------------------------------------------------------------------------|------------------------------------------------------------------------------------------------------------------|
| Weight                 | Weigh the mouse at habituation.                                                              | Actual body weight (g)                                                                                           |
| Alopecia               | Loss of fur color                                                                            | 0 = normal fur density<br>0.5 = < 25% fur loss<br>1 = > 25% fur loss                                             |
| Alopecia               | Inspect for signs of fur loss                                                                | 0 = normal fur density<br>0.5 = < 25% fur loss<br>1 = > 25% fur loss                                             |
| Loss of fur colour     | Note any change in fur colour from black to grey or brown                                    | 0 = normal colour<br>0.5 = focal grey/brown changes<br>1 = grey/brown fur throughout body                        |
| Dermatitis             | Document skin lesions                                                                        | 0 = absent<br>0.5 = focal lesions (e.g. neck, flanks, under chin)<br>1 = widespread or multifocal lesions        |
| Loss of whiskers       | Inspect the animal for signs of a reduction in the number of whiskers                        | 0 = no loss<br>0.5 = reduced number of whiskers<br>1 = absence of whiskers                                       |
| Coat condition         | Inspect the animal for signs of poor grooming                                                | 0 = smooth, sleek, shiny coat<br>0.5 = coat is slightly ruffled<br>1 = unkempt and un-groomed, matted appearance |
| Piloerection           | Observe the animal and look for signs of piloerection, in particular on the back of the neck | 0 = no piloerection<br>0.5 = involves fur at base of neck only<br>1 = widespread piloerection                    |
| Cataracts              | Visual inspection of the mouse to detect opacity in the centre of the eye                    | 0 = no cataract<br>0.5 = small opaque spot<br>1 = clear evidence of opaque lens                                  |
| Cataracts              | Visual inspection of the mouse to detect opacity in the centre of the eye                    | 0 = no cataract<br>0.5 = small opaque spot<br>1 = clear evidence of opaque lens                                  |
| Eye discharge/swelling | Visual inspection of the mouse to detect ocular discharge and swelling of the eyes.          | 0 = normal<br>0.5 = slight swelling and/or secretions<br>1 = obvious bulging and/or secretions                   |
| Microphthalmia         | Inspect eyes                                                                                 | 0 = normal size<br>0.5 = one or both eyes slightly small or sunken<br>1 = one or both eyes very small or sunken  |
| Corneal opacity        | Visual inspection of the mouse to superficial white spots and/or clouding of the cornea      | 0 = normal<br>0.5 = minimal changes in corneal<br>1 = marked clouding and/or spotting of cornea                  |
| Nasal discharge        | Visual inspection of the mouse to detect nasal discharge                                     | 0 = no discharge<br>0.5 = small amount of discharge<br>1 = obvious discharge, both nares                         |

| System/ Parameter    | Clinical assessment of deficit                                                                                                                                     | Scoring                                                                                                                          |
|----------------------|--------------------------------------------------------------------------------------------------------------------------------------------------------------------|----------------------------------------------------------------------------------------------------------------------------------|
| Rectal prolapse      | Grasp the mouse by the base of the tail to detect signs of rectal prolapse                                                                                         | 0 = no prolapse<br>0.5 = small amount of rectum visible below tail<br>1 = rectum clearly visible below tail                      |
| Penile prolapse      | Grasp the mouse by the base of the tail to detect signs of vaginal/uterine or penile prolapse                                                                      | 0 = no prolapsed<br>0.5 = small amount of prolapsed tissue visible<br>1 = prolapsed tissue clearly visible                       |
| Diarrhoea            | Grasp the mouse and invert it to check for signs of diarrhoea. Also look for fecal smearing in home cage                                                           | 0 = none<br>0.5 = some feces or bedding near rectum<br>1 = rectum clearly visible below tail                                     |
| Body condition score | Place mouse on flat surface, hold tail base and manually assess the flesh/fat that covers the sacroiliac region (back and pubic bones)                             | 0 = bones palpable, not prominent<br>0.5 = bones prominent or barely felt<br>1 = bones very prominent or not felt due to obesity |
| Gait disorders       | Observe the freely moving animal to detect abnormalities such as hopping, wobbling, circling, wide stance and weakness.                                            | 0 = no abnormality<br>0.5 = abnormal gait but animal can still walk<br>1 = marked abnormality, impairs ability to move           |
| Menace reflex        | Move an object (cotton swab) towards the mouse's face (between the eyes) 3 times. Record whether the mouse blinks in response.                                     | 0 = always responds<br>0.5 = no response to 1 or 2 approaches<br>1 = no response to 3 approaches                                 |
| Tremor               | Observe the freely moving animal to detect tremor, both at rest and when the animal is trying to climb up an incline                                               | 0 = no tremor<br>0.5 = slight tremor<br>1 = marked tremor; animal cannot climb                                                   |
| Tumours              | Observe the mice to look for symmetry. Hold the base of the tail and manually examine mice for visible or palpable tumours                                         | 0 = absent<br>0.5 = <1.0 cm<br>1 = >1.0 cm or multiple smaller tumours                                                           |
| Kyphosis             | Inspect the mouse for curvature of the spine or hunched posture. Run your fingers down both sides of the spine to detect abnormalities.                            | 0 = absent<br>0.5 = mild curvature<br>1 = clear evidence of hunched posture                                                      |
| Breathing rate/depth | Observe the animal. Note the rate and depth of breathing as well as any gasping behaviour                                                                          | 0 = normal<br>0.5 = modest change in breathing rate and/or depth<br>1 = marked changes in rate/depth, gasping                    |
| Tail stiffening      | Grasp the base of the tail with one hand, and stroke the tail with a finger of the other hand. The tail should wrap freely around the finger when mouse is relaxed | 0 = no stiffening<br>0.5 = tail responsive but does not curl<br>1 = tail completely unresponsive                                 |
| Malocclusions        | Grasp the mouse by the neck scruff, invert and expose teeth. Look for uneven, overgrown teeth                                                                      | 0 = mandibular longer than maxillary incisors<br>0.5 = teeth slightly uneven<br>1 = teeth very uneven and overgrown              |

| System/ Parameter            | Clinical assessment of deficit                                                                                                                                                                                           | Scoring                                                                                                                   |
|------------------------------|--------------------------------------------------------------------------------------------------------------------------------------------------------------------------------------------------------------------------|---------------------------------------------------------------------------------------------------------------------------|
| Distended abdomen            | Hold the mouse vertically by the base of their tail and tip backwards over your hand. Excess fluid visible as a bulge below the rib cage                                                                                 | 0 = absent<br>0.5 = slight budge<br>1 = abdomen clearly distended                                                         |
| Vestibular disturbance       | Hold the base of the tail and lower mouse towards a flat surface. Inspect for head tilt, spinning, circling, head tuck or trunk curling                                                                                  | 0 = absent<br>0.5 = mild head tilt and/or slight spin when lowered<br>1 = severe disequilibrium                           |
| Righting Reflex              | The mouse is restrained in the supine position (belly up) above the bench ( 25cm) and the evaluator quickly and briskly lets go and moves hand away from the mouse. Normal response of the animal is to land on its feet | 0 = normal<br>0.5 = lands on side or back but rights itself immediately after<br>1 = lands on back, fails to right itself |
| Vision loss (Visual Placing) | Lower mouse towards a grid cage lid surface. Evaluate the position the mouse reaches towards the surface                                                                                                                 | 0 = before vibrassee contact<br>0.5 = upon vibrassee contact<br>1 = does not reach (nose in contact with surface)         |
| End of Table                 |                                                                                                                                                                                                                          |                                                                                                                           |
